# Supplementary material
Source: publisher site journal article supplement (https://www.dovepress.com/article/338250)
Supplement: Supplementary file 1 [file get_supplementary_file.php]

**Table S1. Histologic type ICD-O-3 code and corresponding number of patients.**

**Table S2. The median survival time of lung cancer cases in different gender groups.**

**Table S3. The growth rate of the median survival time of lung cancer cases in different gender groups.**

**Table S4. The median survival time of lung cancer cases in different primary site groups.**

**Table S5. The growth rate of the median survival time of lung cancer cases in different primary site groups.**

**Table S6. The median survival time of lung cancer cases in different age groups.**

**Table S7. The growth rate of the median survival time of lung cancer cases in different age groups.**

**Table S8. The median survival time of lung cancer cases in different median household income.**

**Table S9. The growth rate of the median survival time of lung cancer cases in different median household income.**

**Table S10. The median survival time of lung cancer cases in different addresses.**

**Table S11. The growth rate of the median survival time of lung cancer cases in different addresses.**

**Table S12. Median survival time of different histologic types of lung cancer.**

**Table S13. The growth rate of the median survival time of lung cancer cases in different histologic types**

**Table S14. The median survival time of lung cancer cases in different race groups.**

**Table S15. The growth rate of the median survival time of lung cancer cases in different race groups.**

**Table S16. The median survival time of lung cancer cases in different ethnic groups.**

**Table S17. The growth rate of the median survival time of lung cancer cases in different ethnic groups.**

**Table S1. Histologic type ICD-O-3 code and corresponding number of patients.**

| **Group** | **Histologic type ICD-O-3** | **Number** |  | **Group** | **Histologic type ICD-O-3** | **Number** |
| --- | --- | --- | --- | --- | --- | --- |
| 1 | **NEOPLASIE, NAS (800), Neoplasia, NAS** | |  |  | 8072 | 4276 |
|  | 8000 | 66788 |  |  | 8073 | 230 |
|  | 8001 | 290 |  |  | 8074 | 485 |
|  | 8002 | 31 |  |  | 8075 | 44 |
|  | 8003 | 20 |  |  | 8076 | 9 |
|  | 8004 | 55 |  |  | 8078 | 9 |
|  | 8005 | 5 |  |  | 8082 | 84 |
|  | Total | 67189 |  |  | 8083 | 689 |
| 2 | **NEOPLASIE EPITELIALI, NAS (801-804), Epithelial neoplasms, NAS** | |  |  | 8084 | 143 |
|  | 8010 | 60011 |  | 4 | Total | 179942 |
|  | 8011 | 5 |  |  | **ADENOMIE ADENOCARCINOMI (814-838), Adenoma and adenocarcinomas** | |
|  | 8012 | 17286 |  |  | 8140 | 287079 |
|  | 8013 | 5076 |  |  | 8141 | 15 |
|  | 8014 | 37 |  |  | 8143 | 3 |
|  | 8015 | 9 |  |  | 8144 | 21 |
|  | 8020 | 685 |  |  | 8145 | 5 |
|  | 8021 | 237 |  |  | 8146 | 1 |
|  | 8022 | 681 |  |  | 8147 | 1 |
|  | 8030 | 61 |  |  | 8150 | 1 |
|  | 8031 | 626 |  |  | 8170 | 1 |
|  | 8032 | 776 |  |  | 8200 | 247 |
|  | 8033 | 1865 |  |  | 8201 | 16 |
|  | 8034 | 5 |  |  | 8211 | 2 |
|  | 8035 | 6 |  |  | 8230 | 617 |
|  | 8041 | 105007 |  |  | 8231 | 3 |
|  | 8042 | 4551 |  |  | 8240 | 10984 |
|  | 8043 | 63 |  |  | 8241 | 8 |
|  | 8044 | 679 |  |  | 8243 | 5 |
|  | 8045 | 2054 |  |  | 8244 | 77 |
|  | 8046 | 94982 |  |  | 8245 | 19 |
|  | Total | 294702 |  |  | 8246 | 11567 |
| 3 | **NEOPLASIE A CELLULE SQUAMOSE (805-808), Squamous cell neoplasms** | |  |  | 8247 | 5 |
|  | 8050 | 355 |  |  | 8249 | 1182 |
|  | 8051 | 7 |  |  | 8250 | 16652 |
|  | 8052 | 142 |  |  | 8251 | 138 |
|  | 8070 | 162747 |  |  | 8252 | 1604 |
|  | 8071 | 10722 |  |  | 8253 | 1862 |

**Table S1 Continued.**

| **Group** | **Histologic type ICD-O-3** | **Number** |  | **Group** | **Histologic type ICD-O-3** | **Number** |
| --- | --- | --- | --- | --- | --- | --- |
|  | 8254 | 223 |  |  | 8575 | 33 |
|  | 8255 | 8501 |  |  | 8576 | 99 |
|  | 8260 | 4983 |  |  | Total | 10523 |
|  | 8263 | 7 |  | 8 | **Other** |  |
|  | 8290 | 16 |  |  | Basic cell neoplasm (809-811) |  |
|  | 8310 | 943 |  |  | 8090 | 1 |
|  | 8312 | 1 |  |  | 8094 | 4 |
|  | 8320 | 8 |  |  | 8095 | 1 |
|  | 8323 | 528 |  |  | Total | 6 |
|  | 8333 | 32 |  |  | Transitional cell papilloma and carcinomas (812-813) | |
|  | 8340 | 2 |  |  | 8120 | 8 |
|  | 8341 | 3 |  |  | 8123 | 144 |
|  | 8342 | 1 |  |  | 8124 | 1 |
|  | 8345 | 1 |  |  | 8130 | 1 |
|  | 8350 | 2 |  |  | Total | 154 |
|  | Total | 347366 |  |  | Neoplasia of the skin annexes (839-842), | |
| 5 | **NEOPLASIE CISTICHE, MUCINOSE E SIEROSE (844-849), Cystic, mucinous and serous neoplasms** | |  |  | 8401 | 2 |
|  | 8441 | 8 |  |  | 8410 | 4 |
|  | 8460 | 3 |  |  | Total | 6 |
|  | 8470 | 20 |  |  | Mucoepidermoid neoplasia |  |
|  | 8471 | 2 |  |  | 8430 | 422 |
|  | 8480 | 7699 |  |  | Ductal and lobular neoplasms (850-854) | |
|  | 8481 | 3241 |  |  | 8500 | 5 |
|  | 8490 | 1097 |  |  | 8503 | 2 |
|  | Total | 12070 |  |  | 8507 | 61 |
| 6 | **NEOPLASIE A CELLULE ACINOSE (855), Acinous cell neoplasm** | |  |  | 8510 | 1 |
|  | 8550 | 7012 |  |  | 8524 | 1 |
|  | 8551 | 32 |  |  | 8525 | 1 |
|  | Total | 7044 |  |  | 8530 | 1 |
| 7 | **NEOPLASIE EPITELIALI COMPLESSE (856/857), Complex epithelial neoplasms** | |  |  | Total | 72 |
|  | 8560 | 9741 |  |  | Thymic epithelial neoplasia (858) | |
|  | 8562 | 14 |  |  | 8580 | 7 |
|  | 8570 | 55 |  |  | 8581 | 2 |
|  | 8571 | 1 |  |  | 8582 | 1 |
|  | 8572 | 8 |  |  | 8584 | 1 |
|  | 8574 | 572 |  |  | 8585 | 1 |

**Table S1 Continued.**

| **Group** | **Histologic type ICD-O-3** | | **Number** |  | **Group** | **Histologic type ICD-O-3** | **Number** |
| --- | --- | --- | --- | --- | --- | --- | --- |
| 8 | Total | | 12 |  | 8 | Total | 13 |
|  | Specialized gonadic neoplasia | | |  |  | Myomatous neoplasia (889-892) |  |
|  | 8650 | 1 | |  |  | 8890 | 155 |
|  | Paragangliomas and glomerular tumors (868-871) | | |  |  | 8891 | 3 |
|  | 8680 | | 7 |  |  | 8894 | 3 |
|  | 8710 | | 1 |  |  | 8896 | 2 |
|  | 8711 | | 4 |  |  | 8900 | 13 |
|  | Total | | 12 |  |  | 8901 | 5 |
|  | Melanoma (872-879) | |  |  |  | 8902 | 2 |
|  | 8720 | 53 | |  |  | 8910 | 5 |
|  | 8743 | | 1 |  |  | 8912 | 2 |
|  | 8770 | 1 | |  |  | 8920 | 4 |
|  | 8772 | | 3 |  |  | 8921 | 1 |
|  | Total | | 58 |  |  | Total | 195 |
|  | Soft part cancer and sarcomas, NAS (880) | | |  |  | Complex mixed and stromal neoplasia (893-899) | |
|  | 8800 | | 359 |  |  | 8933 | 6 |
|  | 8801 | | 156 |  |  | 8934 | 1 |
|  | 8802 | | 64 |  |  | 8935 | 1 |
|  | 8803 | | 12 |  |  | 8936 | 1 |
|  | 8804 | | 18 |  |  | 8940 | 8 |
|  | 8805 | | 29 |  |  | 8941 | 1 |
|  | 8806 | | 4 |  |  | 8963 | 12 |
|  | Total | 642 | |  |  | 8972 | 65 |
|  | Fibromatous neoplasia (881-883) | | |  |  | 8973 | 55 |
|  | 8810 | | 24 |  |  | 8980 | 446 |
|  | 8811 | | 11 |  |  | 8982 | 8 |
|  | 8815 | | 128 |  |  | 8990 | 4 |
|  | 8824 | | 1 |  |  | Total | 608 |
|  | 8830 | | 61 |  |  | Fibroepithelial neoplasia (900-903) | |
|  | Total | | 225 |  |  | 9015 | 3 |
|  | Myxomatous neoplasia | |  |  |  | 9020 | 1 |
|  | 8840 | 5 | |  |  | Total | 4 |
|  | Lipomatous neoplasia (885-888) |  | |  |  | Synovial-similar neoplasia (904) |  |
|  | 8850 | 4 | |  |  | 9040 | 85 |
|  | 8851 | 1 | |  |  | 9041 | 67 |
|  | 8852 | 2 | |  |  | 9042 | 1 |
|  | 8854 | 4 | |  |  | 9043 | 13 |
|  | 8855 | 2 | |  |  | Total | 166 |

**Table S1 Continued.**

| **Group** | **Histologic type ICD-O-3** | | **Number** |  | **Group** | **Histologic type ICD-O-3** | **Number** |
| --- | --- | --- | --- | --- | --- | --- | --- |
| 8 | Mesothelial neoplasia (905) | |  |  | 8 | 9220 | 6 |
|  | 9050 | | 398 |  |  | 9231 | 11 |
|  | 9051 | | 60 |  |  | Total | 28 |
|  | 9052 | | 81 |  |  | Giant cell tumors |  |
|  | 9053 | | 9 |  |  | 9250 | 1 |
|  | Total | | 548 |  |  | Miscellaneous bone tumors | |
|  | Germinal cell neoplasia (906-909) | | |  |  | 9260 | 15 |
|  | 9061 | | 1 |  |  | Dental cancers |  |
|  | 9064 | | 3 |  |  | 9310 | 1 |
|  | 9065 | | 2 |  |  | Miscellaneous tumors (935-937) |  |
|  | 9070 | 3 | |  |  | 9364 | 13 |
|  | 9071 | | 4 |  |  | 9370 | 3 |
|  | 9084 | | 2 |  |  | Total | 16 |
|  | 9085 | | 2 |  |  | Glioma |  |
|  | Total | | 17 |  |  | 9473 | 15 |
|  | Trophoblastic neoplasia (910) | | |  |  | Neuroepithelioma neoplasia (949-952) | |
|  | 9100 | | 9 |  |  | 9500 | 3 |
|  | 9101 | | 2 |  |  | 9522 | 1 |
|  | Total | | 11 |  |  | Total | 4 |
|  | Blood vessel cancers (912-916) | |  |  |  | Meningioma |  |
|  | 9120 | | 106 |  |  | 9530 | 1 |
|  | 9130 | | 12 |  |  | Tumors of the nervous sheathes (954-957) | |
|  | 9133 | | 62 |  |  | 9540 | 21 |
|  | 9150 | | 7 |  |  | 9560 | 8 |
|  | Total | | 187 |  |  | 9561 | 2 |
|  | Cartilage bone neoplasia (918-924) | | |  |  | 9571 | 1 |
|  | 9180 | 9 | |  |  | Total | 32 |
|  | 9181 | | 1 |  |  | Granular cell tumors and alveolar sarcomas of the milli parts | |
|  | 9182 | | 1 |  |  | 9581 | 4 |

**Table S2. The median survival time of lung cancer cases in different gender groups.**

| **Year of diagnosis** | **Female (months)** | **Male (months)** | **Male minus female (months)** | **Total (months)** |
| --- | --- | --- | --- | --- |
| 2000 | 10.530 | 9.450 | 9.900 | 1.080 |
| 2001 | 10.660 | 9.420 | 9.930 | 1.240 |
| 2002 | 10.630 | 9.400 | 9.920 | 1.230 |
| 2003 | 10.790 | 9.620 | 10.120 | 1.170 |
| 2004 | 11.000 | 9.620 | 10.210 | 1.380 |
| 2005 | 11.120 | 9.710 | 10.320 | 1.410 |
| 2006 | 11.330 | 9.840 | 10.480 | 1.490 |
| 2007 | 11.540 | 10.030 | 10.680 | 1.510 |
| 2008 | 11.550 | 10.130 | 10.750 | 1.420 |
| 2009 | 11.790 | 10.210 | 10.900 | 1.580 |
| 2010 | 11.890 | 10.150 | 10.900 | 1.740 |
| 2011 | 13.090 | 10.510 | 11.300 | 2.580 |
| 2012 | 12.810 | 10.210 | 11.090 | 2.600 |
| 2013 | 13.380 | 10.440 | 11.300 | 2.940 |
| 2014 | 14.230 | 10.650 | 11.540 | 3.580 |
| 2015 | 16.020 | 11.040 | 11.990 | 4.980 |
| 2016 | 16.850 | 11.300 | 12.950 | 5.550 |
| 2017 | 18.000 | 11.540 | 14.030 | 6.460 |

**Table S3. The growth rate of the median survival time of lung cancer cases in different gender groups.**

| **Year of diagnosis** | **Female** | **Male** | **Male minus female** | **Total** |
| --- | --- | --- | --- | --- |
| 2000 | 100.00% | 100.00% | 100.00% | 100.00% |
| 2001 | 101.23% | 99.68% | 114.81% | 100.30% |
| 2002 | 100.95% | 99.47% | 113.89% | 100.20% |
| 2003 | 102.47% | 101.80% | 108.33% | 102.22% |
| 2004 | 104.46% | 101.80% | 127.78% | 103.13% |
| 2005 | 105.60% | 102.75% | 130.56% | 104.24% |
| 2006 | 107.60% | 104.13% | 137.96% | 105.86% |
| 2007 | 109.59% | 106.14% | 139.81% | 107.88% |
| 2008 | 109.69% | 107.20% | 131.48% | 108.59% |
| 2009 | 111.97% | 108.04% | 146.30% | 110.10% |
| 2010 | 112.92% | 107.41% | 161.11% | 110.10% |
| 2011 | 124.31% | 111.22% | 238.89% | 114.14% |
| 2012 | 121.65% | 108.04% | 240.74% | 112.02% |
| 2013 | 127.07% | 110.48% | 272.22% | 114.14% |
| 2014 | 135.14% | 112.70% | 331.48% | 116.57% |
| 2015 | 152.14% | 116.83% | 461.11% | 121.11% |
| 2016 | 160.02% | 119.58% | 513.89% | 130.81% |
| 2017 | 170.94% | 122.12% | 598.15% | 141.72% |

**Table S4. The median survival time of lung cancer cases in different primary site groups.**

| **Year of diagnosis** | **Right upper lobe (months)** | **Right middle lobe (months)** | **Right lower lobe (months)** | **Left upper lobe (months)** | **Left lower lobe (months)** | **Main bronchus (months)** | **Overlapping lesion of lung (months)** | **Lung NOS (months)** | **Other (months)** | **Total (months)** |
| --- | --- | --- | --- | --- | --- | --- | --- | --- | --- | --- |
| 2000 | 10.830 | 10.990 | 10.600 | 10.980 | 10.620 | 8.230 | 9.940 | 7.820 | 9.160 | 9.900 |
| 2001 | 10.900 | 10.840 | 10.390 | 10.990 | 10.650 | 8.140 | 9.680 | 7.950 | 8.140 | 9.930 |
| 2002 | 10.880 | 11.010 | 10.520 | 10.990 | 10.720 | 8.210 | 9.660 | 7.840 | 9.060 | 9.920 |
| 2003 | 11.340 | 10.860 | 10.770 | 11.060 | 10.940 | 8.250 | 9.910 | 7.900 | 8.640 | 10.120 |
| 2004 | 11.250 | 12.180 | 10.720 | 11.240 | 11.070 | 8.450 | 10.480 | 7.910 | 7.670 | 10.210 |
| 2005 | 11.240 | 11.740 | 10.940 | 11.240 | 11.380 | 8.620 | 9.530 | 8.040 | 7.710 | 10.320 |
| 2006 | 11.580 | 11.640 | 11.340 | 11.560 | 11.670 | 8.300 | 10.030 | 7.950 | 7.820 | 10.480 |
| 2007 | 11.800 | 13.090 | 11.640 | 11.570 | 11.960 | 8.570 | 9.580 | 7.990 | 8.580 | 10.680 |
| 2008 | 11.700 | 14.020 | 11.830 | 11.770 | 12.000 | 8.280 | 9.810 | 8.080 | 8.760 | 10.750 |
| 2009 | 11.950 | 14.200 | 11.730 | 11.960 | 13.450 | 8.570 | 9.450 | 8.070 | 8.660 | 10.900 |
| 2010 | 12.090 | 15.560 | 11.550 | 11.820 | 13.020 | 8.570 | 10.070 | 8.080 | 8.350 | 10.900 |
| 2011 | 13.600 | 15.800 | 12.410 | 12.890 | 14.000 | 8.700 | 9.900 | 8.270 | 9.500 | 11.300 |
| 2012 | 12.530 | 15.630 | 11.950 | 12.120 | 12.990 | 8.650 | 10.110 | 8.080 | 9.900 | 11.090 |
| 2013 | 13.250 | 17.090 | 12.840 | 12.910 | 14.870 | 8.630 | 10.150 | 8.090 | 8.630 | 11.300 |
| 2014 | 14.140 | 17.650 | 13.850 | 14.460 | 14.700 | 8.890 | 10.000 | 8.080 | 9.160 | 11.540 |
| 2015 | 15.830 | 19.430 | 15.180 | 16.000 | 16.610 | 8.790 | 10.050 | 8.280 | 9.670 | 11.990 |
| 2016 | 16.620 | 20.600 | 16.530 | 16.240 | 17.110 | 8.750 | 10.630 | 8.360 | 10.100 | 12.950 |
| 2017 | 17.930 | 20.370 | 17.690 | 17.120 | 19.000 | 8.940 | 10.270 | 8.360 | 9.550 | 14.030 |

**Table S5. The growth rate of the median survival time of lung cancer cases in different primary site groups.**

| **Year of diagnosis** | **Right upper lobe** | **Right middle lobe** | **Right lower lobe** | **Left upper lobe** | **Left lower lobe** | **Main bronchus** | **Overlapping lesion of lung** | **Lung NOS** | **Other** | **Total** |
| --- | --- | --- | --- | --- | --- | --- | --- | --- | --- | --- |
| 2000 | 100.00% | 100.00% | 100.00% | 100.00% | 100.00% | 100.00% | 100.00% | 100.00% | 100.00% | 100.00% |
| 2001 | 100.65% | 98.64% | 98.02% | 100.09% | 100.28% | 98.91% | 97.38% | 101.66% | 88.86% | 100.30% |
| 2002 | 100.46% | 100.18% | 99.25% | 100.09% | 100.94% | 99.76% | 97.18% | 100.26% | 98.91% | 100.20% |
| 2003 | 104.71% | 98.82% | 101.60% | 100.73% | 103.01% | 100.24% | 99.70% | 101.02% | 94.32% | 102.22% |
| 2004 | 103.88% | 110.83% | 101.13% | 102.37% | 104.24% | 102.67% | 105.43% | 101.15% | 83.73% | 103.13% |
| 2005 | 103.79% | 106.82% | 103.21% | 102.37% | 107.16% | 104.74% | 95.88% | 102.81% | 84.17% | 104.24% |
| 2006 | 106.93% | 105.91% | 106.98% | 105.28% | 109.89% | 100.85% | 100.91% | 101.66% | 85.37% | 105.86% |
| 2007 | 108.96% | 119.11% | 109.81% | 105.37% | 112.62% | 104.13% | 96.38% | 102.17% | 93.67% | 107.88% |
| 2008 | 108.03% | 127.57% | 111.60% | 107.19% | 112.99% | 100.61% | 98.69% | 103.32% | 95.63% | 108.59% |
| 2009 | 110.34% | 129.21% | 110.66% | 108.93% | 126.65% | 104.13% | 95.07% | 103.20% | 94.54% | 110.10% |
| 2010 | 111.63% | 141.58% | 108.96% | 107.65% | 122.60% | 104.13% | 101.31% | 103.32% | 91.16% | 110.10% |
| 2011 | 125.58% | 143.77% | 117.08% | 117.40% | 131.83% | 105.71% | 99.60% | 105.75% | 103.71% | 114.14% |
| 2012 | 115.70% | 142.22% | 112.74% | 110.38% | 122.32% | 105.10% | 101.71% | 103.32% | 108.08% | 112.02% |
| 2013 | 122.35% | 155.51% | 121.13% | 117.58% | 140.02% | 104.86% | 102.11% | 103.45% | 94.21% | 114.14% |
| 2014 | 130.56% | 160.60% | 130.66% | 131.69% | 138.42% | 108.02% | 100.60% | 103.32% | 100.00% | 116.57% |
| 2015 | 146.17% | 176.80% | 143.21% | 145.72% | 156.40% | 106.80% | 101.11% | 105.88% | 105.57% | 121.11% |
| 2016 | 153.46% | 187.44% | 155.94% | 147.91% | 161.11% | 106.32% | 106.94% | 106.91% | 110.26% | 130.81% |
| 2017 | 165.56% | 185.35% | 166.89% | 155.92% | 178.91% | 108.63% | 103.32% | 106.91% | 104.26% | 141.72% |

**Table S6. The median survival time of lung cancer cases in different age groups.**

| **Year of diagnosis** | **≤ 44 years (months)** | **45-54 years (months)** | **55-64 years (months)** | **65-74 years (months)** | **75-84 years (months)** | **84+ years (months)** | **Total (months)** |
| --- | --- | --- | --- | --- | --- | --- | --- |
| 2000 | 13.450 | 11.350 | 10.830 | 10.140 | 9.030 | 7.600 | 9.900 |
| 2001 | 12.640 | 11.440 | 11.080 | 10.240 | 8.930 | 7.690 | 9.930 |
| 2002 | 12.360 | 11.120 | 11.140 | 10.260 | 9.010 | 7.590 | 9.920 |
| 2003 | 13.770 | 11.320 | 11.330 | 10.460 | 9.230 | 7.740 | 10.120 |
| 2004 | 11.980 | 11.350 | 11.630 | 10.660 | 9.220 | 7.840 | 10.210 |
| 2005 | 13.610 | 12.030 | 11.390 | 10.800 | 9.410 | 7.870 | 10.320 |
| 2006 | 18.690 | 11.860 | 11.750 | 11.060 | 9.430 | 7.990 | 10.480 |
| 2007 | 17.440 | 13.190 | 11.810 | 11.300 | 9.740 | 7.990 | 10.680 |
| 2008 | 18.700 | 12.680 | 11.910 | 11.380 | 9.850 | 8.130 | 10.750 |
| 2009 | 20.010 | 12.920 | 12.320 | 11.580 | 10.000 | 8.150 | 10.900 |
| 2010 | 20.280 | 13.930 | 11.950 | 11.760 | 9.870 | 8.190 | 10.900 |
| 2011 | 23.360 | 14.020 | 12.860 | 12.340 | 10.410 | 8.430 | 11.300 |
| 2012 | 24.140 | 13.410 | 12.080 | 11.750 | 10.380 | 8.240 | 11.090 |
| 2013 | 25.700 | 14.540 | 13.030 | 12.240 | 10.340 | 8.540 | 11.300 |
| 2014 | 23.240 | 16.030 | 13.380 | 13.680 | 10.570 | 8.540 | 11.540 |
| 2015 | 34.830 | 18.570 | 14.770 | 15.040 | 11.090 | 8.720 | 11.990 |
| 2016 | 24.000 | 18.610 | 16.520 | 15.850 | 11.440 | 8.680 | 12.950 |
| 2017 | 12.000 | 19.760 | 17.090 | 17.040 | 11.690 | 9.080 | 14.030 |

**Table S7. The growth rate of the median survival time of lung cancer cases in different age groups.**

| **Year of diagnosis** | **≤ 44 years** | **45-54 years** | **55-64 years** | **65-74 years** | **75-84 years** | **84+ years** | **Total** |
| --- | --- | --- | --- | --- | --- | --- | --- |
| 2000 | 100.00% | 100.00% | 100.00% | 100.00% | 100.00% | 100.00% | 100.00% |
| 2001 | 93.98% | 100.79% | 102.31% | 100.99% | 98.89% | 101.18% | 100.30% |
| 2002 | 91.90% | 97.97% | 102.86% | 101.18% | 99.78% | 99.87% | 100.20% |
| 2003 | 102.38% | 99.74% | 104.62% | 103.16% | 102.21% | 101.84% | 102.22% |
| 2004 | 89.07% | 100.00% | 107.39% | 105.13% | 102.10% | 103.16% | 103.13% |
| 2005 | 101.19% | 105.99% | 105.17% | 106.51% | 104.21% | 103.55% | 104.24% |
| 2006 | 138.96% | 104.49% | 108.49% | 109.07% | 104.43% | 105.13% | 105.86% |
| 2007 | 129.67% | 116.21% | 109.05% | 111.44% | 107.86% | 105.13% | 107.88% |
| 2008 | 139.03% | 111.72% | 109.97% | 112.23% | 109.08% | 106.97% | 108.59% |
| 2009 | 148.77% | 113.83% | 113.76% | 114.20% | 110.74% | 107.24% | 110.10% |
| 2010 | 150.78% | 122.73% | 110.34% | 115.98% | 109.30% | 107.76% | 110.10% |
| 2011 | 173.68% | 123.52% | 118.74% | 121.70% | 115.28% | 110.92% | 114.14% |
| 2012 | 179.48% | 118.15% | 111.54% | 115.88% | 114.95% | 108.42% | 112.02% |
| 2013 | 191.08% | 128.11% | 120.31% | 120.71% | 114.51% | 112.37% | 114.14% |
| 2014 | 172.79% | 141.23% | 123.55% | 134.91% | 117.05% | 112.37% | 116.57% |
| 2015 | 258.96% | 163.61% | 136.38% | 148.32% | 122.81% | 114.74% | 121.11% |
| 2016 | 178.44% | 163.96% | 152.54% | 156.31% | 126.69% | 114.21% | 130.81% |
| 2017 | 89.22% | 174.10% | 157.80% | 168.05% | 129.46% | 119.47% | 141.72% |

**Table S8. The median survival time of lung cancer cases in different median household income.**

| **Year of diagnosis** | **< $35,000 (months)** | **$35,000-$44,999 (months)** | **$45,000-$54,999 (months)** | **$55,000-$64,999 (months)** | **$65,000-$74,999 (months)** | **$75,000+ (months)** | **Total (months)** |
| --- | --- | --- | --- | --- | --- | --- | --- |
| 2000 | 9.080 | 9.640 | 9.580 | 9.830 | 9.810 | 10.230 | 9.900 |
| 2001 | 9.310 | 9.560 | 9.560 | 9.850 | 9.870 | 10.300 | 9.930 |
| 2002 | 9.280 | 9.460 | 9.440 | 9.820 | 9.940 | 10.320 | 9.920 |
| 2003 | 9.050 | 9.300 | 9.710 | 10.040 | 10.100 | 10.560 | 10.120 |
| 2004 | 9.490 | 9.660 | 9.640 | 10.030 | 10.230 | 10.750 | 10.210 |
| 2005 | 9.420 | 9.600 | 9.910 | 10.160 | 10.380 | 10.760 | 10.320 |
| 2006 | 9.210 | 10.220 | 10.130 | 10.460 | 10.200 | 11.300 | 10.480 |
| 2007 | 9.870 | 10.110 | 10.320 | 10.530 | 10.710 | 11.260 | 10.680 |
| 2008 | 9.670 | 10.090 | 10.270 | 10.580 | 10.810 | 11.490 | 10.750 |
| 2009 | 9.930 | 10.320 | 10.530 | 10.760 | 11.050 | 11.550 | 10.900 |
| 2010 | 10.090 | 10.300 | 10.410 | 10.720 | 11.140 | 11.750 | 10.900 |
| 2011 | 10.450 | 10.580 | 10.830 | 11.210 | 11.540 | 12.620 | 11.300 |
| 2012 | 9.800 | 10.350 | 10.570 | 11.080 | 11.380 | 12.260 | 11.090 |
| 2013 | 9.930 | 10.520 | 10.570 | 11.380 | 11.770 | 12.580 | 11.300 |
| 2014 | 10.360 | 10.790 | 10.830 | 11.420 | 11.980 | 13.940 | 11.540 |
| 2015 | 10.140 | 10.840 | 11.270 | 11.770 | 14.250 | 15.730 | 11.990 |
| 2016 | 10.290 | 10.900 | 11.210 | 11.980 | 14.570 | 16.590 | 12.950 |
| 2017 | 10.500 | 10.890 | 11.490 | 12.260 | 15.730 | 18.240 | 14.030 |

**Table S9. The growth rate of the median survival time of lung cancer cases in different median household income.**

| **Year of diagnosis** | **< $35,000** | **$35,000-$44,999** | **$45,000- $54,999** | **$55,000-$64,999** | **$65,000-$74,999** | **$75,000+** | **Total** |
| --- | --- | --- | --- | --- | --- | --- | --- |
| 2000 | 100.00% | 100.00% | 100.00% | 100.00% | 100.00% | 100.00% | 100.00% |
| 2001 | 102.53% | 99.17% | 99.79% | 100.20% | 100.61% | 100.68% | 100.30% |
| 2002 | 102.20% | 98.13% | 98.54% | 99.90% | 101.33% | 100.88% | 100.20% |
| 2003 | 99.67% | 96.47% | 101.36% | 102.14% | 102.96% | 103.23% | 102.22% |
| 2004 | 104.52% | 100.21% | 100.63% | 102.03% | 104.28% | 105.08% | 103.13% |
| 2005 | 103.74% | 99.59% | 103.44% | 103.36% | 105.81% | 105.18% | 104.24% |
| 2006 | 101.43% | 106.02% | 105.74% | 106.41% | 103.98% | 110.46% | 105.86% |
| 2007 | 108.70% | 104.88% | 107.72% | 107.12% | 109.17% | 110.07% | 107.88% |
| 2008 | 106.50% | 104.67% | 107.20% | 107.63% | 110.19% | 112.32% | 108.59% |
| 2009 | 109.36% | 107.05% | 109.92% | 109.46% | 112.64% | 112.90% | 110.10% |
| 2010 | 111.12% | 106.85% | 108.66% | 109.05% | 113.56% | 114.86% | 110.10% |
| 2011 | 115.09% | 109.75% | 113.05% | 114.04% | 117.64% | 123.36% | 114.14% |
| 2012 | 107.93% | 107.37% | 110.33% | 112.72% | 116.00% | 119.84% | 112.02% |
| 2013 | 109.36% | 109.13% | 110.33% | 115.77% | 119.98% | 122.97% | 114.14% |
| 2014 | 114.10% | 111.93% | 113.05% | 116.17% | 122.12% | 136.27% | 116.57% |
| 2015 | 111.67% | 112.45% | 117.64% | 119.74% | 145.26% | 153.76% | 121.11% |
| 2016 | 113.33% | 113.07% | 117.01% | 121.87% | 148.52% | 162.17% | 130.81% |
| 2017 | 115.64% | 112.97% | 119.94% | 124.72% | 160.35% | 178.30% | 141.72% |

**Table S10. The median survival time of lung cancer cases in different addresses.**

| **Year of diagnosis** | **Counties in metropolitan areas ge 1 million pop (months)** | **Counties in metropolitan areas of 250,000 to 1 million pop (months)** | **Counties in metropolitan areas of lt 250 thousand pop (months)** | **Nonmetropolitan counties adjacent to a metropolitan area (months)** | **Nonmetropolitan counties not adjacent to a metropolitan area (months)** | **Total (months)** |
| --- | --- | --- | --- | --- | --- | --- |
| 2000 | 9.960 | 9.940 | 9.840 | 9.720 | 9.570 | 9.900 |
| 2001 | 10.030 | 9.960 | 9.870 | 9.580 | 9.570 | 9.930 |
| 2002 | 10.060 | 9.830 | 9.710 | 9.690 | 9.610 | 9.920 |
| 2003 | 10.220 | 10.240 | 9.900 | 9.680 | 9.770 | 10.120 |
| 2004 | 10.360 | 10.160 | 10.190 | 9.740 | 9.750 | 10.210 |
| 2005 | 10.490 | 10.200 | 10.010 | 10.120 | 9.890 | 10.320 |
| 2006 | 10.660 | 10.520 | 10.020 | 10.290 | 9.920 | 10.480 |
| 2007 | 10.870 | 10.670 | 10.390 | 10.160 | 10.410 | 10.680 |
| 2008 | 10.960 | 10.670 | 10.390 | 10.410 | 10.170 | 10.750 |
| 2009 | 11.170 | 10.700 | 10.690 | 10.510 | 10.070 | 10.900 |
| 2010 | 11.190 | 10.780 | 10.390 | 10.490 | 10.080 | 10.900 |
| 2011 | 11.620 | 11.190 | 10.910 | 10.700 | 10.430 | 11.300 |
| 2012 | 11.480 | 10.910 | 10.730 | 10.330 | 9.990 | 11.090 |
| 2013 | 11.730 | 11.270 | 10.600 | 10.410 | 10.120 | 11.300 |
| 2014 | 11.940 | 11.330 | 11.400 | 10.580 | 10.500 | 11.540 |
| 2015 | 13.310 | 12.450 | 11.600 | 10.990 | 10.610 | 11.990 |
| 2016 | 14.950 | 12.500 | 11.510 | 11.160 | 10.490 | 12.950 |
| 2017 | 15.970 | 13.720 | 11.700 | 11.520 | 10.990 | 14.030 |

Note: Ge, greater than; Lt, less than.

**Table S11. The growth rate of the median survival time of lung cancer cases in different addresses.**

| **Year of diagnosis** | **Counties in metropolitan areas ge 1 million pop** | **Counties in metropolitan areas of 250,000 to 1 million pop** | **Counties in metropolitan areas of lt 250 thousand pop** | **Nonmetropolitan counties adjacent to a metropolitan area** | **Nonmetropolitan counties not adjacent to a metropolitan area** | **Total** |
| --- | --- | --- | --- | --- | --- | --- |
| 2000 | 100.00% | 100.00% | 100.00% | 100.00% | 100.00% | 100.00% |
| 2001 | 100.70% | 100.20% | 100.30% | 98.56% | 100.00% | 100.30% |
| 2002 | 101.00% | 98.89% | 98.68% | 99.69% | 100.42% | 100.20% |
| 2003 | 102.61% | 103.02% | 100.61% | 99.59% | 102.09% | 102.22% |
| 2004 | 104.02% | 102.21% | 103.56% | 100.21% | 101.88% | 103.13% |
| 2005 | 105.32% | 102.62% | 101.73% | 104.12% | 103.34% | 104.24% |
| 2006 | 107.03% | 105.84% | 101.83% | 105.86% | 103.66% | 105.86% |
| 2007 | 109.14% | 107.34% | 105.59% | 104.53% | 108.78% | 107.88% |
| 2008 | 110.04% | 107.34% | 105.59% | 107.10% | 106.27% | 108.59% |
| 2009 | 112.15% | 107.65% | 108.64% | 108.13% | 105.22% | 110.10% |
| 2010 | 112.35% | 108.45% | 105.59% | 107.92% | 105.33% | 110.10% |
| 2011 | 116.67% | 112.58% | 110.87% | 110.08% | 108.99% | 114.14% |
| 2012 | 115.26% | 109.76% | 109.04% | 106.28% | 104.39% | 112.02% |
| 2013 | 117.77% | 113.38% | 107.72% | 107.10% | 105.75% | 114.14% |
| 2014 | 119.88% | 113.98% | 115.85% | 108.85% | 109.72% | 116.57% |
| 2015 | 133.63% | 125.25% | 117.89% | 113.07% | 110.87% | 121.11% |
| 2016 | 150.10% | 125.75% | 116.97% | 114.81% | 109.61% | 130.81% |
| 2017 | 160.34% | 138.03% | 118.90% | 118.52% | 114.84% | 141.72% |

Note: Ge, greater than; Lt, less than.

**Table S12. Median survival time of different histologic types of lung cancer.**

| **Year of diagnosis** | **Neoplasia, NAS (months)** | **Epithelial neoplasms, NAS (months)** | **Squamous cell neoplasms (months)** | **Adenoma and adenocarcinomas (months)** | **Cystic, mucinous and serous neoplasms (months)** | **Acinous cell neoplasm (months)** | **Complex epithelial neoplasms (months)** | **Others (months)** | **Total (months)** |
| --- | --- | --- | --- | --- | --- | --- | --- | --- | --- |
| 2000 | 7.540 | 8.610 | 11.030 | 11.540 | 10.730 | 52.290 | 14.340 | 11.900 | 9.900 |
| 2001 | 7.750 | 8.630 | 10.920 | 11.780 | 10.400 | 54.400 | 16.630 | 12.130 | 9.930 |
| 2002 | 7.570 | 8.650 | 10.930 | 11.820 | 10.490 | 73.810 | 19.250 | 11.790 | 9.920 |
| 2003 | 7.750 | 8.770 | 11.260 | 12.780 | 11.220 | 54.670 | 16.300 | 11.720 | 10.120 |
| 2004 | 7.630 | 8.850 | 11.210 | 14.090 | 9.860 | 62.490 | 15.790 | 10.850 | 10.210 |
| 2005 | 7.620 | 8.820 | 11.540 | 14.540 | 11.780 | 69.090 | 17.330 | 16.670 | 10.320 |
| 2006 | 7.660 | 8.890 | 11.760 | 15.140 | 11.380 | 81.510 | 19.470 | 18.690 | 10.480 |
| 2007 | 7.600 | 8.980 | 11.660 | 16.490 | 15.430 | 72.000 | 18.060 | 11.750 | 10.680 |
| 2008 | 7.780 | 8.820 | 11.890 | 16.650 | 11.580 | 100.180 | 15.480 | 11.840 | 10.750 |
| 2009 | 7.480 | 8.940 | 12.230 | 16.490 | 14.780 | 81.000 | 16.360 | 13.040 | 10.900 |
| 2010 | 7.730 | 8.840 | 11.720 | 15.870 | 14.600 | 84.260 | 15.020 | 15.720 | 10.900 |
| 2011 | 7.660 | 8.890 | 12.010 | 17.230 | 18.890 | 76.020 | 15.180 | 12.270 | 11.300 |
| 2012 | 7.570 | 8.730 | 11.740 | 16.230 | 22.000 | 79.430 | 13.820 | 11.560 | 11.090 |
| 2013 | 7.460 | 8.880 | 12.130 | 16.520 | 23.650 | 60.000 | 14.690 | 11.530 | 11.300 |
| 2014 | 7.710 | 8.850 | 13.190 | 17.250 | 22.220 | 48.000 | 13.280 | 18.920 | 11.540 |
| 2015 | 7.900 | 9.040 | 13.860 | 19.180 | 31.800 | 36.000 | 13.530 | 16.620 | 11.990 |
| 2016 | 7.970 | 9.100 | 14.430 | 20.090 | 34.760 | 24.000 | 15.600 | 15.570 | 12.950 |
| 2017 | 8.100 | 9.200 | 15.270 | 21.620 | 12.000 | 12.000 | 16.530 | 15.670 | 14.030 |

**Table S13. The growth rate of the median survival time of lung cancer cases in different histologic types**

| **Year of diagnosis** | **Neoplasia, NAS** | **Epithelial neoplasms, NAS** | **Squamous cell neoplasms** | **Adenoma and adenocarcinomas** | **Cystic, mucinous and serous neoplasms** | **Acinous cell neoplasm** | **Complex epithelial neoplasms** | **Others** | **Total** |
| --- | --- | --- | --- | --- | --- | --- | --- | --- | --- |
| 2000 | 100.00% | 100.00% | 100.00% | 100.00% | 100.00% | 100.00% | 100.00% | 100.00% | 100.00% |
| 2001 | 102.79% | 100.23% | 99.00% | 102.08% | 96.92% | 104.04% | 115.97% | 101.93% | 100.30% |
| 2002 | 100.40% | 100.46% | 99.09% | 102.43% | 97.76% | 141.16% | 134.24% | 99.08% | 100.20% |
| 2003 | 102.79% | 101.86% | 102.09% | 110.75% | 104.57% | 104.55% | 113.67% | 98.49% | 102.22% |
| 2004 | 101.19% | 102.79% | 101.63% | 122.10% | 91.89% | 119.51% | 110.11% | 91.18% | 103.13% |
| 2005 | 101.06% | 102.44% | 104.62% | 126.00% | 109.79% | 132.13% | 120.85% | 140.08% | 104.24% |
| 2006 | 101.59% | 103.25% | 106.62% | 131.20% | 106.06% | 155.88% | 135.77% | 157.06% | 105.86% |
| 2007 | 100.80% | 104.30% | 105.71% | 142.89% | 143.80% | 137.69% | 125.94% | 98.74% | 107.88% |
| 2008 | 103.18% | 102.44% | 107.80% | 144.28% | 107.92% | 191.59% | 107.95% | 99.50% | 108.59% |
| 2009 | 99.20% | 103.83% | 110.88% | 142.89% | 137.74% | 154.91% | 114.09% | 109.58% | 110.10% |
| 2010 | 102.52% | 102.67% | 106.26% | 137.52% | 136.07% | 161.14% | 104.74% | 132.10% | 110.10% |
| 2011 | 101.59% | 103.25% | 108.88% | 149.31% | 176.05% | 145.38% | 105.86% | 103.11% | 114.14% |
| 2012 | 100.40% | 101.39% | 106.44% | 140.64% | 205.03% | 151.90% | 96.37% | 97.14% | 112.02% |
| 2013 | 98.94% | 103.14% | 109.97% | 143.15% | 220.41% | 114.74% | 102.44% | 96.89% | 114.14% |
| 2014 | 102.25% | 102.79% | 119.58% | 149.48% | 207.08% | 91.80% | 92.61% | 158.99% | 116.57% |
| 2015 | 104.77% | 104.99% | 125.66% | 166.20% | 296.37% | 68.85% | 94.35% | 139.66% | 121.11% |
| 2016 | 105.70% | 105.69% | 130.83% | 174.09% | 323.95% | 45.90% | 108.79% | 130.84% | 130.81% |
| 2017 | 107.43% | 106.85% | 138.44% | 187.35% | 111.84% | 22.95% | 115.27% | 131.68% | 141.72% |

**Table S14. The median survival time of lung cancer cases in different race groups.**

| **Year of diagnosis** | **White (months)** | **Black (months)** | **Asian and others (months)** | **Total (months)** |
| --- | --- | --- | --- | --- |
| 2000 | 9.920 | 9.530 | 10.320 | 9.900 |
| 2001 | 9.950 | 9.640 | 10.370 | 9.930 |
| 2002 | 9.920 | 9.610 | 10.630 | 9.920 |
| 2003 | 10.140 | 9.640 | 10.760 | 10.120 |
| 2004 | 10.200 | 9.720 | 11.550 | 10.210 |
| 2005 | 10.320 | 9.820 | 11.450 | 10.320 |
| 2006 | 10.480 | 10.130 | 11.320 | 10.480 |
| 2007 | 10.650 | 10.310 | 12.440 | 10.680 |
| 2008 | 10.740 | 10.260 | 11.980 | 10.750 |
| 2009 | 10.870 | 10.430 | 13.320 | 10.900 |
| 2010 | 10.840 | 10.640 | 12.950 | 10.900 |
| 2011 | 11.250 | 10.930 | 14.720 | 11.300 |
| 2012 | 10.960 | 11.040 | 15.190 | 11.090 |
| 2013 | 11.220 | 11.110 | 14.390 | 11.300 |
| 2014 | 11.440 | 11.210 | 17.030 | 11.540 |
| 2015 | 11.940 | 11.470 | 16.750 | 11.990 |
| 2016 | 12.780 | 11.700 | 17.530 | 12.950 |
| 2017 | 13.750 | 11.890 | 20.420 | 14.030 |

**Table S15. The growth rate of the median survival time of lung cancer cases in different race groups.**

| **Year of diagnosis** | **White** | **Black** | **Asian and others** | **Total** |
| --- | --- | --- | --- | --- |
| 2000 | 100.00% | 100.00% | 100.00% | 100.00% | |
| 2001 | 100.30% | 101.15% | 100.48% | 100.30% | |
| 2002 | 100.00% | 100.84% | 103.00% | 100.20% | |
| 2003 | 102.22% | 101.15% | 104.26% | 102.22% | |
| 2004 | 102.82% | 101.99% | 111.92% | 103.13% | |
| 2005 | 104.03% | 103.04% | 110.95% | 104.24% | |
| 2006 | 105.65% | 106.30% | 109.69% | 105.86% | |
| 2007 | 107.36% | 108.18% | 120.54% | 107.88% | |
| 2008 | 108.27% | 107.66% | 116.09% | 108.59% | |
| 2009 | 109.58% | 109.44% | 129.07% | 110.10% | |
| 2010 | 109.27% | 111.65% | 125.48% | 110.10% | |
| 2011 | 113.41% | 114.69% | 142.64% | 114.14% | |
| 2012 | 110.48% | 115.84% | 147.19% | 112.02% | |
| 2013 | 113.10% | 116.58% | 139.44% | 114.14% | |
| 2014 | 115.32% | 117.63% | 165.02% | 116.57% | |
| 2015 | 120.36% | 120.36% | 162.31% | 121.11% | |
| 2016 | 128.83% | 122.77% | 169.86% | 130.81% | |
| 2017 | 138.61% | 124.76% | 197.87% | 141.72% | |

**Table S16. The median survival time of lung cancer cases in different ethnic groups.**

| **Year of diagnosis** | **Non-Spanish-Hispanic-Latino (months)** | **Spanish-Hispanic-Latino (months)** | **Total (months)** |
| --- | --- | --- | --- |
| 2000 | 9.890 | 10.000 | 9.900 |
| 2001 | 9.940 | 9.700 | 9.930 |
| 2002 | 9.940 | 9.480 | 9.920 |
| 2003 | 10.110 | 10.160 | 10.120 |
| 2004 | 10.230 | 9.800 | 10.210 |
| 2005 | 10.330 | 10.090 | 10.320 |
| 2006 | 10.500 | 10.160 | 10.480 |
| 2007 | 10.690 | 10.640 | 10.680 |
| 2008 | 10.740 | 10.900 | 10.750 |
| 2009 | 10.900 | 10.990 | 10.900 |
| 2010 | 10.910 | 10.770 | 10.900 |
| 2011 | 11.310 | 11.120 | 11.300 |
| 2012 | 11.070 | 11.300 | 11.090 |
| 2013 | 11.310 | 11.110 | 11.300 |
| 2014 | 11.550 | 11.340 | 11.540 |
| 2015 | 12.050 | 11.680 | 11.990 |
| 2016 | 12.950 | 12.970 | 12.950 |
| 2017 | 14.110 | 12.860 | 14.030 |

**Table S17. The growth rate of the median survival time of lung cancer cases in different ethnic groups.**

| **Year of diagnosis** | **Non-Spanish-Hispanic-Latino** | **Spanish-Hispanic-Latino** | **Total** |
| --- | --- | --- | --- |
| 2000 | 100.00% | 100.00% | 100.00% |
| 2001 | 100.51% | 97.00% | 100.30% |
| 2002 | 100.51% | 94.80% | 100.20% |
| 2003 | 102.22% | 101.60% | 102.22% |
| 2004 | 103.44% | 98.00% | 103.13% |
| 2005 | 104.45% | 100.90% | 104.24% |
| 2006 | 106.17% | 101.60% | 105.86% |
| 2007 | 108.09% | 106.40% | 107.88% |
| 2008 | 108.59% | 109.00% | 108.59% |
| 2009 | 110.21% | 109.90% | 110.10% |
| 2010 | 110.31% | 107.70% | 110.10% |
| 2011 | 114.36% | 111.20% | 114.14% |
| 2012 | 111.93% | 113.00% | 112.02% |
| 2013 | 114.36% | 111.10% | 114.14% |
| 2014 | 116.78% | 113.40% | 116.57% |
| 2015 | 121.84% | 116.80% | 121.11% |
| 2016 | 130.94% | 129.70% | 130.81% |
| 2017 | 142.67% | 128.60% | 141.72% |
